# Supplementary material
Source: PubMed Central journal article supplement (PMC2529046)
Supplement: 0806312105_0806312105SI.pdf [file 0806312105_0806312105SI.pdf]

# Supporting Information

Zhang *et al.* 10.1073/pnas.0806312105

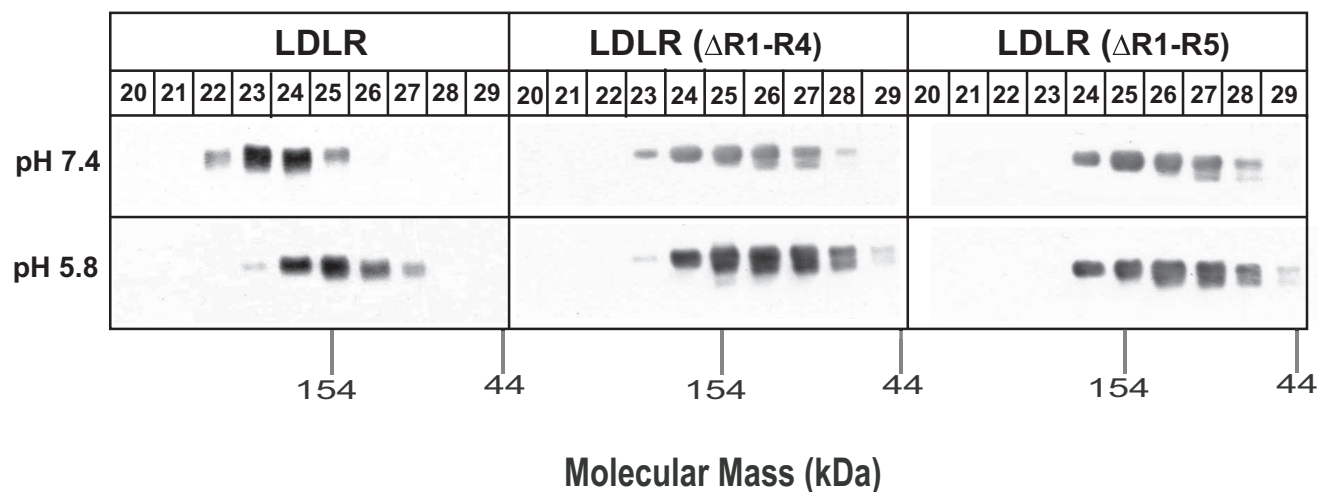

**Fig. S1.** No acid-dependent conformational change in the LDLR lacking four (R1–R4) or five (R1–R5) ligand binding repeats. Purified recombinant extracellular domain of the LDLR was incubated in 500  $\mu$ l of buffer A (pH 7.4 or 6.0) for 2 h at room temperature. The samples were subjected to centrifugation and the supernatants were loaded on a Superdex 200 10/300 GL column equilibrated with Buffer A. The elution patterns of LDLR were determined by SDS/PAGE and immunoblotting of the collected fractions as described in Fig. 1. Interference with the pH-dependent change in the LDLR is not sufficient to cause degradation of the LDLR by PCSK9. No conformational change was seen in LDLR ( $\Delta R1-R5$ ), which fails to be degraded by PCSK9.
